# Supplementary material
Source: PubMed Central journal article supplement (PMC5101143)
Supplement: NIHMS806890-supplement-1.pdf [file NIHMS806890-supplement-1.pdf]

1 **Dietary Zinc Alters the Microbiota and Decreases Resistance to *Clostridium difficile* Infection**

2

3 Joseph P. Zackular<sup>1</sup>, Jessica L. Moore<sup>2,3</sup>, Ashley T. Jordan<sup>1</sup>, Lillian J. Juttukonda<sup>1</sup>, Michael J. Noto<sup>1,4</sup>,  
4 Maribeth R. Nicholson<sup>5</sup>, Jonathan D. Crews<sup>6</sup>, Matthew W. Semler<sup>4</sup>, Yaofang Zhang<sup>1</sup>, Lorraine B. Ware<sup>1,4</sup>,  
5 M. Kay Washington<sup>1</sup>, Walter J. Chazin<sup>2,7,8</sup>, Richard M. Caprioli<sup>2,3,7,9</sup>, and Eric P. Skaar<sup>1,10\*</sup>

6

7

8 <sup>1</sup>Department of Pathology, Microbiology, and Immunology, Vanderbilt University School of Medicine,  
9 Nashville, Tennessee, United States

10 <sup>2</sup>Department of Chemistry, Vanderbilt University, Nashville, Tennessee, United States

11 <sup>3</sup>Mass Spectrometry Research Center, Vanderbilt University, Nashville, Tennessee, United States

12 <sup>4</sup>Department of Medicine, Vanderbilt University, Nashville, Tennessee, United States

13 <sup>5</sup>Department of Pediatrics, Vanderbilt University, Nashville, Tennessee, United States

14 <sup>6</sup>Department of Pediatrics, Baylor College of Medicine, Houston, Texas, United States

15 <sup>7</sup>Department of Biochemistry, Vanderbilt University, Nashville, Tennessee, United States

16 <sup>8</sup>Center for Structural Biology, Vanderbilt University, Nashville, Tennessee, United States

17 <sup>9</sup>Department of Pharmacology, Vanderbilt University, Nashville, Tennessee, United States

18 <sup>10</sup>Tennessee Valley Healthcare Systems, US Department of Veterans Affairs, Nashville, Tennessee,  
19 United States

20

21

22 **\* Corresponding Author:**

23 Eric P. Skaar Ph.D., M.P.H.

24 Ernest Goodpasture Professor of Pathology

25 Vice Chair for Basic Research

26 [eric.skaar@vanderbilt.edu](mailto:eric.skaar@vanderbilt.edu)

27 **Supplementary Materials:**

28

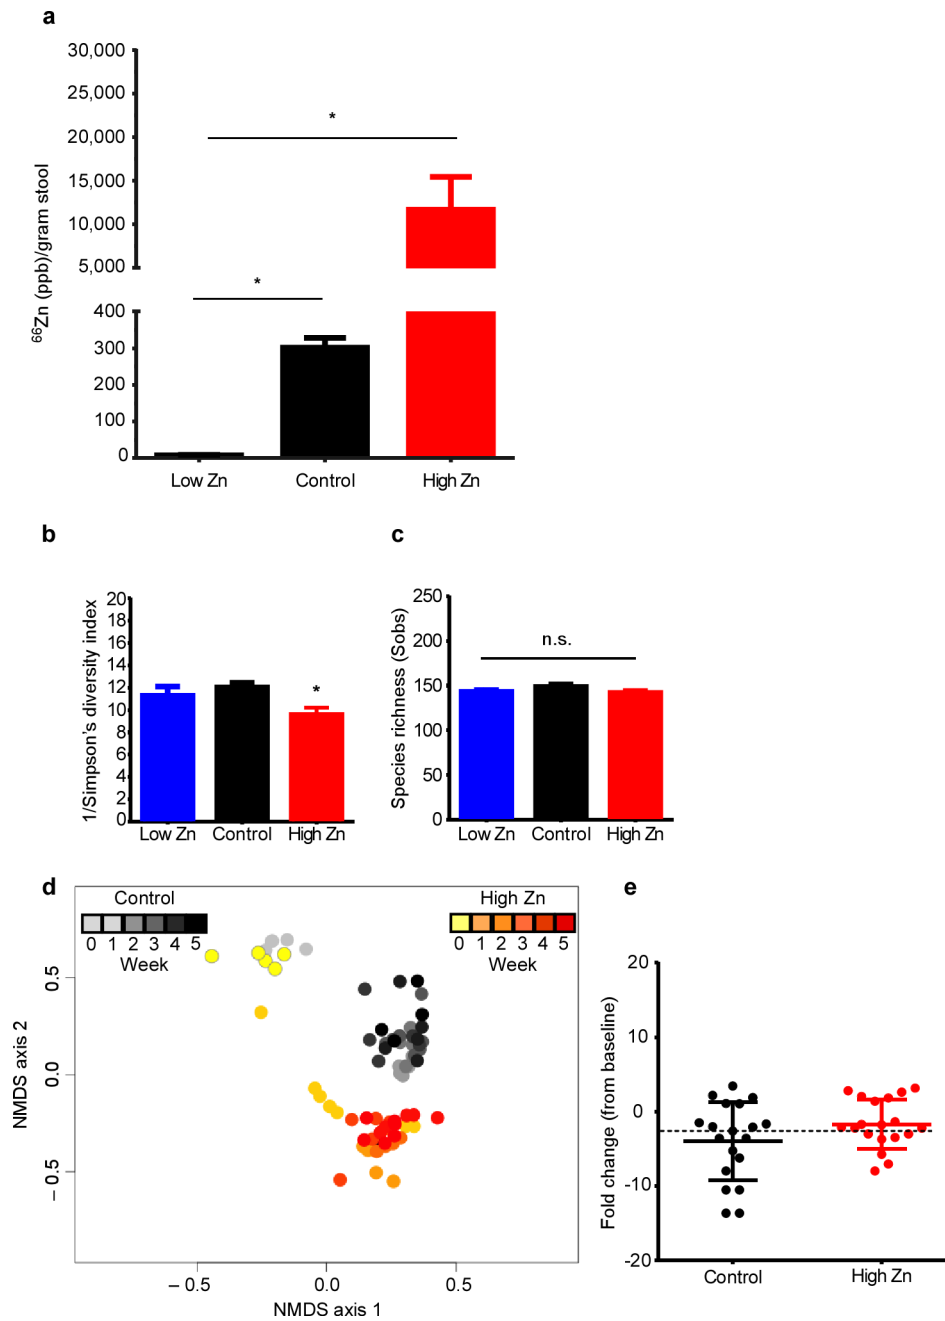

29

30

31 **Supplementary Fig. 1. The impact of dietary Zn on the gastrointestinal tract and gut microbiota.** Zn

32 concentration in the stool of mice fed altered Zn diets (a). ICP-MS was performed on stool samples from

33 mice fed altered Zn diets for five-weeks (n=5/group). Inverse Simpson's diversity for mice fed low Zn,

34 control, or high Zn diets (**b**). Species richness measured by Sobs (number of observed OTUs) for each  
35 altered Zn diet (**c**). NMDS plot depicting time course of diet mediated microbiota alterations (**d**). Grey  
36 scale indicates samples from control diet. Red scale indicates samples from High Zn diet. 16S rRNA gene  
37 copy number following dietary Zn alterations (**e**). Fold change is calculated relative to baseline  
38 microbiota samples. Data are represented as mean  $\pm$  standard deviation. \*  $P < 0.01$ ; by Mann-Whitney  
39 test.

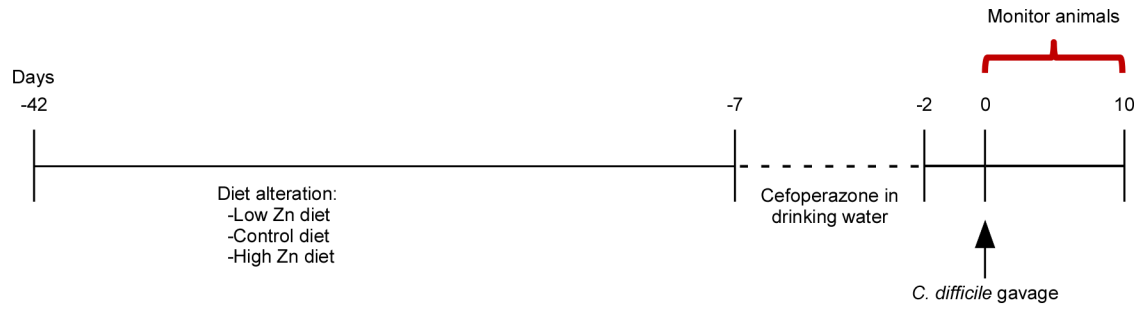

40

41

42 **Supplementary Fig. 2. Model of diet manipulation and *C. difficile* infection.** Mice are put on altered

43 Zn diets at four weeks of age. Five weeks of diet manipulation is followed by cefoperazone treatment in

44 the drinking water. Mice are infected via gavage with  $10^5$  spores of *C. difficile* strain 630 or R20291.

45 Cefoperazone concentration and length of infection following gavage varies as described in text and

46 methods.

47

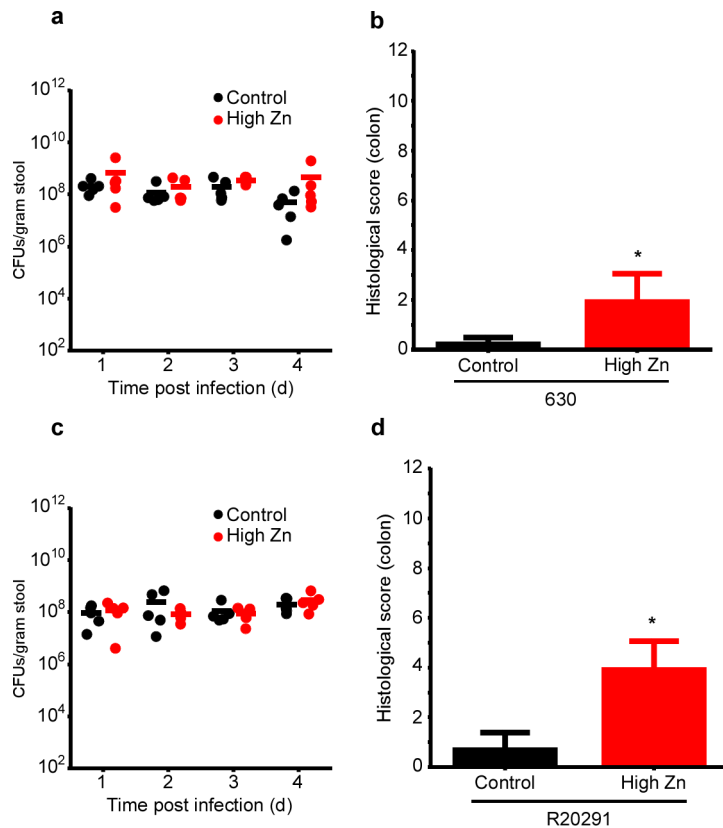

48

49

50 **Supplementary Fig. 3. The impact of dietary Zn on *C. difficile* colonization and colitis.** CFU analysis

51 (a) and blinded histology scoring of colons (b) from mice fed a high Zn or control diet and infected with

52 *C. difficile* strain 630 (n=5/group). CFU analysis (c) and blinded histology scoring of colons (d) from

53 mice fed a high Zn or control diet and infected with R20291 (n=5/group). All infections were performed

54 on susceptible mice pre-treated with 0.5 mg/ml cefoperazone. Blinded histological scores were performed

55 four days post-infection. CFU data are represented as mean and histological data are represented as mean

56 ± standard deviation. \*  $P < 0.01$ ; by Mann-Whitney test.

57

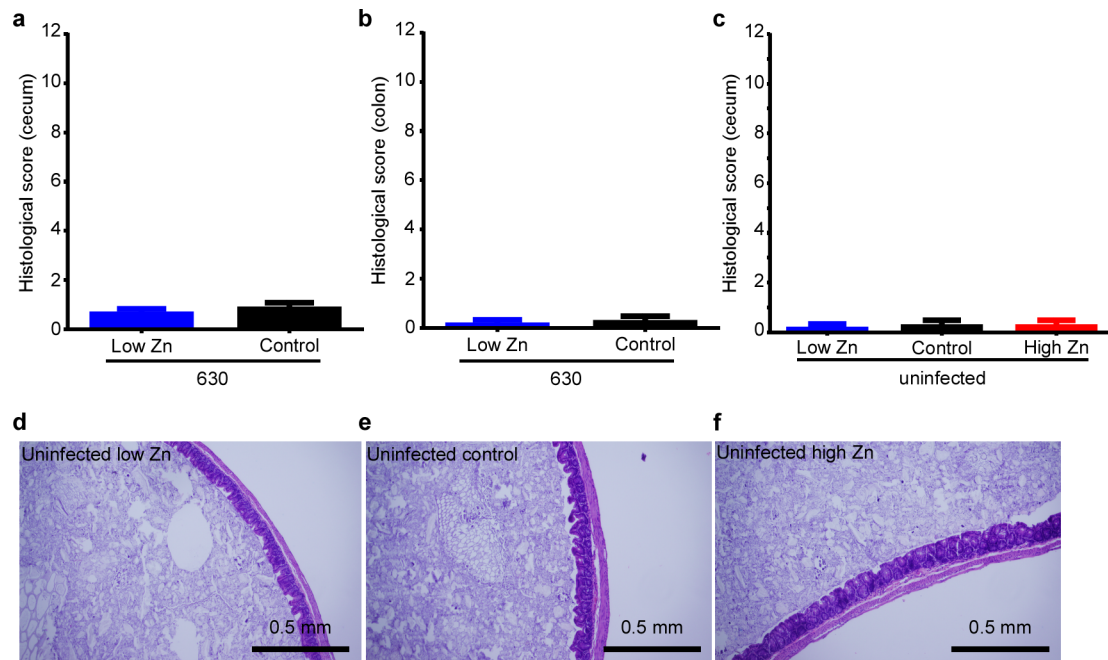

58

59

60 **Supplementary Fig. 4. Dietary Zn alterations do not impact pathogenesis in mice in the absence of**

61 *C. difficile*. Blinded histological scoring from ceca (n=10/group) (a) or colons (n=5/group) (b) of mice

62 infected with *C. difficile* strain 630 following 5-weeks of low Zn or control diets (n=10/group). Blinded

63 histology scoring of ceca from mice fed a low Zn, control, or high Zn diet prior to infection (c)

64 (n=5/group). Representative H&E stained images from mice fed the low Zn (d), control (e), or high Zn

65 diet (f). Scale, 0.5 mm. All data are represented as mean  $\pm$  standard deviation. \*  $P < 0.01$ ; by Mann-

66 Whitney test. Images are representative of 5 replicate ceca per group.

67

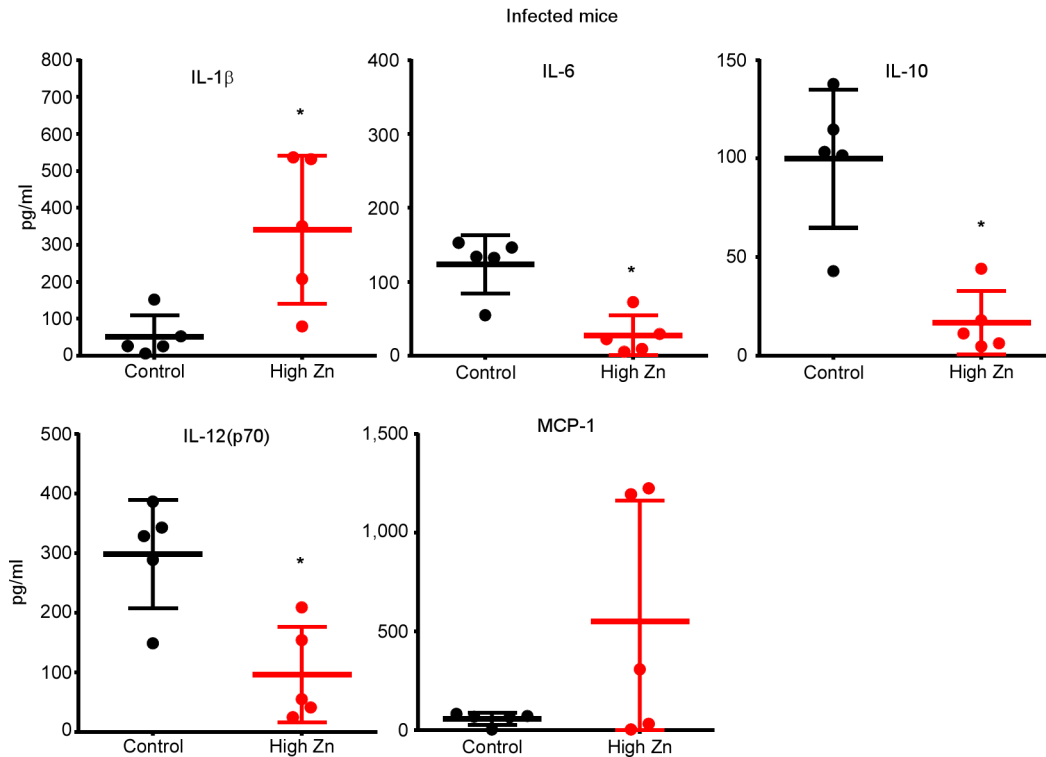

68  
69

70 **Supplementary Fig. 5. Cytokine production following dietary Zn alteration and infection with *C.***  
 71 ***difficile*.** Cytokine levels were measured from ceca of mice fed either the high Zn or control diet and  
 72 infected with *C. difficile* strain R20291 (n=5/group). Whole ceca were frozen, homogenized, and  
 73 normalized to total protein content. Cytokine levels were measured using the Luminex Flexmap 3D  
 74 platform. All data are represented as mean  $\pm$  standard deviation. \*  $P < 0.05$ ; by Mann-Whitney test.

75

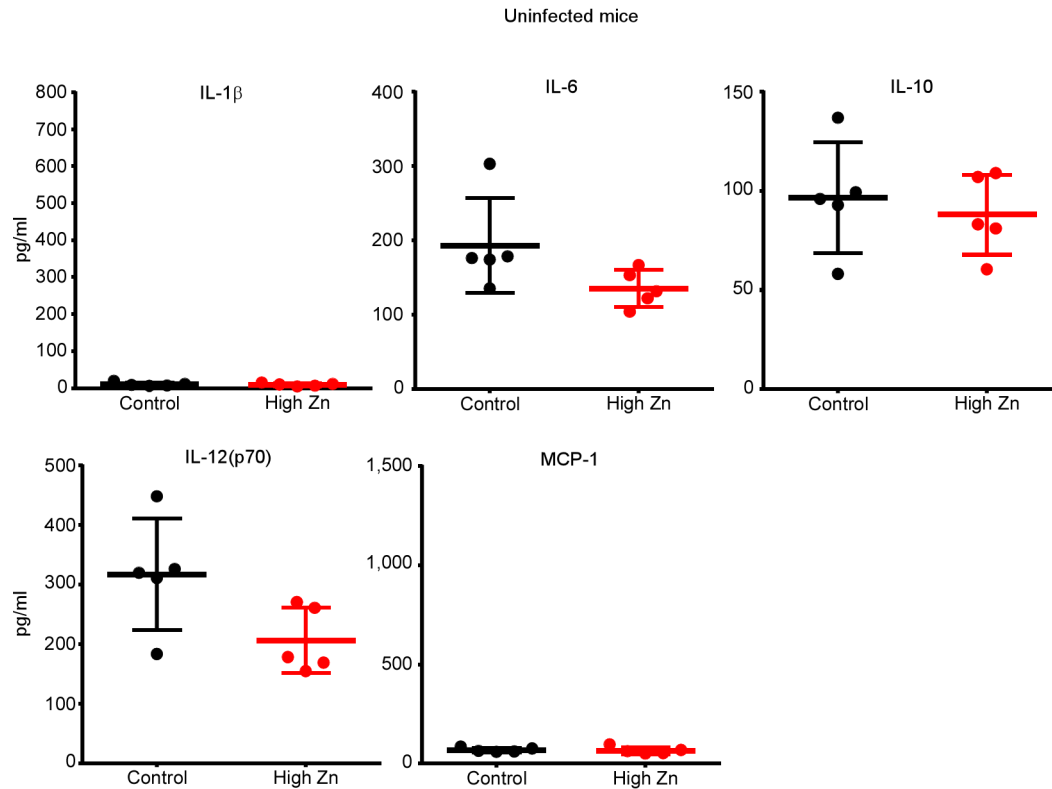

76

77

78 **Supplementary Fig. 6. Cytokine production following dietary Zn alteration in the absence of CDI.**

79 Cytokine levels were measured from ceca of uninfected mice fed either the high Zn or control diet

80 (n=5/group). Whole ceca were frozen, homogenized, and normalized to total protein content. Cytokine

81 levels were measured using the Luminex Flexmap 3D platform. All data are represented as mean  $\pm$

82 standard deviation. \*  $P < 0.05$ ; by Mann-Whitney test.

83



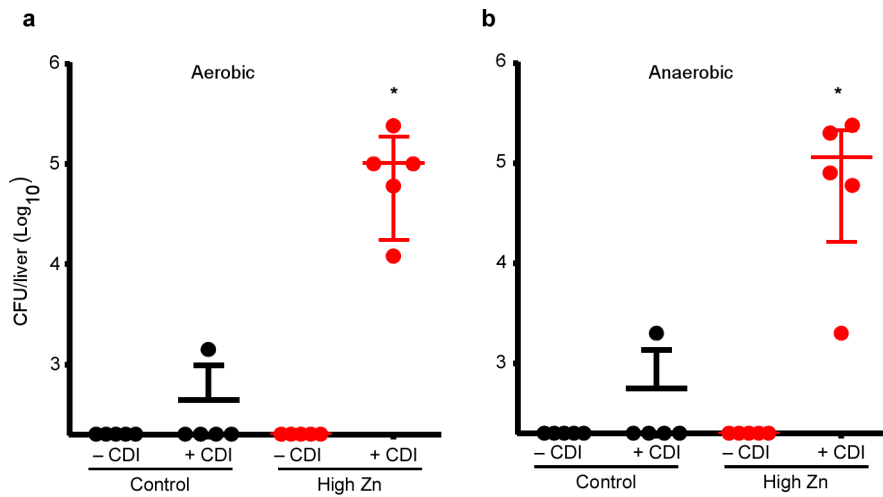

84

85

86 **Supplementary Fig 7. Quantification of gut microbiota translocation during CDI.** Livers were  
 87 harvested prior to infection (- CDI) or five-days post-infection (+ CDI) and bacterial burden was  
 88 quantified under aerobic (a) and anaerobic (b) conditions (n=5/group). All data are represented as mean ±  
 89 standard deviation. \*  $P < 0.01$ ; by Mann-Whitney test.

90

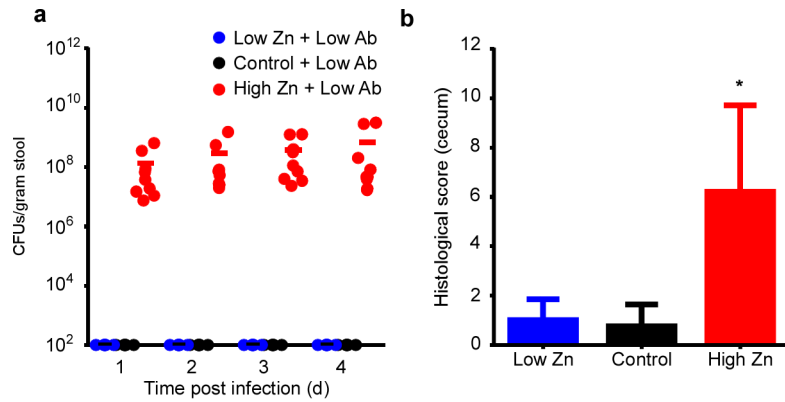

91

92

93 **Supplementary Fig 8. The impact of dietary Zn alterations on susceptibility to CDI.** CFUs were

94 quantified following dietary Zn alterations and low level antibiotic treatment (0.01 mg/ml cefoperazone)

95 (n=9/group) (a). Blinded histological scores quantified four-days post low-level cefoperazone infection

96 with R20291 (b) (n=9/group). Data shown for control and high Zn treatment groups are the same as

97 Figure 3. CFU data are represented as mean and histological data are represented as mean ± standard

98 deviation. \*  $P < 0.01$ ; by Mann-Whitney test.

99

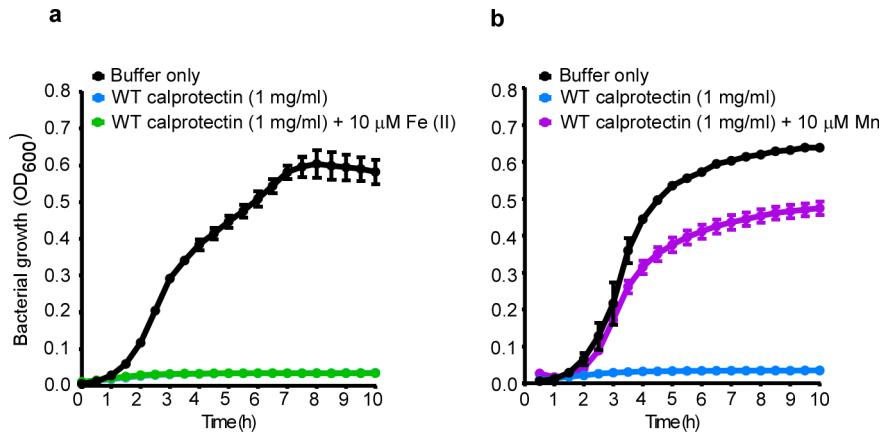

100

101

102 **Supplementary Fig 9. Rescue of calprotectin mediated growth inhibition with metal**

103 **supplementation.** Bacterial growth is shown for *C. difficile* strain R20291 grown in the presence of 1

104 mg/ml recombinant calprotectin. Medium was supplemented with 10  $\mu$ M FeSO<sub>4</sub> (a) or MnCl<sub>2</sub> (b).

105 Treatment with WT calprotectin (1 mg/ml) resulted in no growth.

106

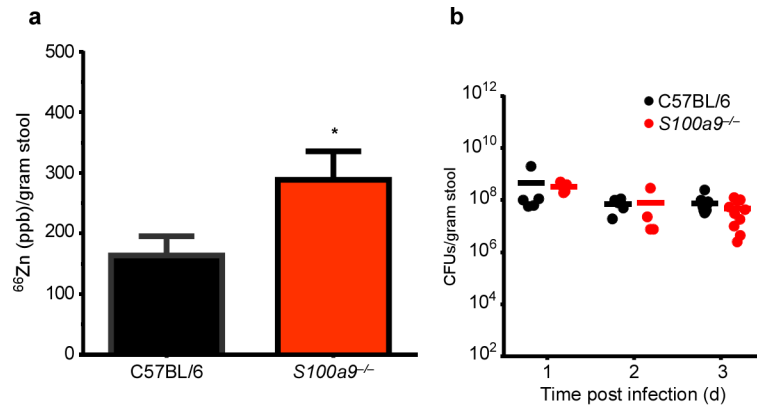

107

108

109 **Supplementary Fig 10. Calprotectin-deficient mice have increased fecal Zn levels.** Zn levels were

110 quantified using ICP-MS from eight-week old wild type C57BL/6 or calprotectin-deficient (*S100a9*<sup>-/-</sup>)

111 mice fed standard chow diets (n=5/group) (a). CFUs were quantified following infection of wildtype or

112 calprotectin-deficient (*S100a9*<sup>-/-</sup>) mice with *C. difficile* strain R20291 (day 1-2, n=5/group; day 3,

113 n=10/group). Mice were fed standard chow diets (b). CFU data are represented as mean and ICP-MS data

114 are represented as mean ± standard deviation. \*  $P < 0.01$ ; by Mann-Whitney test.

115

116 **Supplementary Tables**

117

|                                                            | Calprotectin (median, IQR)                  | <i>P</i> value |
|------------------------------------------------------------|---------------------------------------------|----------------|
| Fever<br>Yes (n=14)<br>No (n=11)                           | 5.45 (2.84-22.27)<br>10.75 (3.48-172.00)    | 0.55           |
| Blood in stools<br>Yes (n=5)<br>No (n=20)                  | 171.95 (62.01-647.16)<br>5.10 (2.85-18.03)  | 0.023*         |
| Elevated WBC (>15,000)<br>Yes= 5<br>No= 19<br>(1 not done) | 66.94 (13.8-736.26)<br>3.82 (2.84-22.26)    | 0.0116*        |
| Low albumin (<2.5)<br>Yes= 2<br>No= 13<br>(10 not done)    | 1006.9 (13.79-2000.00)<br>6.14 (3.82-62.01) | 0.1619         |

118

119 **Supplementary Table 1. Relationship between fecal calprotectin and signs of severe CDI in**

120 **pediatric patients.** Fecal calprotectin was measured in twenty-five pediatric patients with CDI and levels

121 were compared between patients with signs of mild and severe CDI. \*  $P < 0.05$ ; by Mann-Whitney test.

122
